# Supplementary material
Source: HighWire-hosted journal article supplement (https://www.jneurosci.org/highwire/filestream/601708/field_highwire_adjunct_files/0/Supplemental_Material.pdf)

### Supplementary results

The main contrasts from the fMRI experiment are presented in Table S1 and Figure S1.

**Table S1.** Main effects observed for Valence and Magnitude in standard and boost trials.

| A. Valence standard trials: Gain (5+25) vs. Loss (5+25)                   |      |          | Stereotactic coordinates |      |     |        |         |
|---------------------------------------------------------------------------|------|----------|--------------------------|------|-----|--------|---------|
| Brain region                                                              | ~BA  | # voxels | x                        | y    | z   | T peak | p value |
| L ventral striatum                                                        |      | 103      | -24                      | 4    | -12 | 7.34   | <0.0001 |
|                                                                           |      |          | -24                      | 8    | 16  | 6.28   | <0.0001 |
| R ventral striatum                                                        |      |          | 28                       | -8   | -4  | 6.89   | <0.0001 |
| B. Valence boost trials: Gain (125) vs. Loss (125)                        |      |          |                          |      |     |        |         |
| L ventral striatum                                                        |      | 26       | -8                       | 4    | -8  | 6.49   | <0.0001 |
| R ventral striatum                                                        |      | 20       | 16                       | 8    | -4  | 6.06   | <0.0001 |
| R cuneus                                                                  | BA18 | 63       | 32                       | -84  | 4   | 6.78   | <0.0001 |
| C. Magnitude in boost trials:<br>125 (Gain + Loss) vs. 7/27 (Gain + Loss) |      |          |                          |      |     |        |         |
| R cuneus                                                                  | BA18 | 50       | 20                       | -100 | 0   | 8.62   | <0.0001 |
| Rostral ACC                                                               | BA32 | 39       | 0                        | 44   | 32  | 6.66   | <0.001  |
|                                                                           |      |          | 8                        | 40   | 20  | 5.45   | <0.003  |

Notes. MNI coordinates and T value for the peak location in a particular anatomical cluster  $P < 0.05$ ; 20 voxels spatial extent corrected for multiple comparisons at the whole-brain level using a family-wise error (FWE) rate.  $P$  value for the peak of activation at cluster level corrected for multiple comparisons and the number of voxels in each cluster (n. voxels).\_BA = approximate Brodmann's area; L = Left hemisphere; R = Right hemisphere; ACC=Anterior cingulate cortex;

**Figure S1. Valence and Magnitude effects.** (A) Valence effects for standard trials (Gain vs. loss) (B) Valence effect for the boost trials (C) Magnitude effects shown as the contrast 125 (Gain + Loss) versus 7/27 (Gain + Loss). Group average activation maps are superimposed on a group-averaged structural MRI image in standard stereotactic space ( $t$ -score overlays after multiple comparisons correction at the whole-brain level,  $P < 0.05$ ).

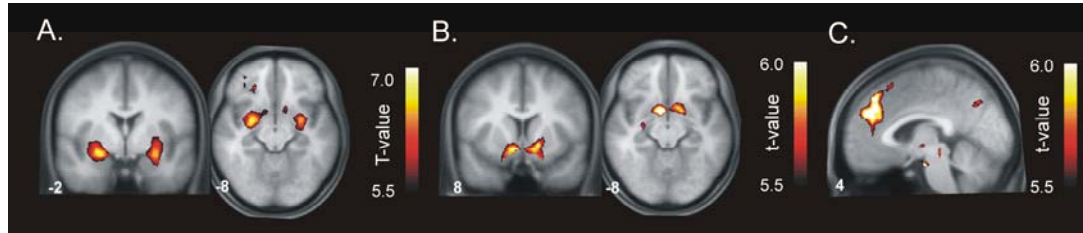

Supplement: Supplemental_Material.pdf [file Supplemental_Material.pdf]
